# Supplementary material
Source: publisher figshare collection journal article supplement (https://tandf.figshare.com/ndownloader/files/14079821)
Supplement: Supplementary file 1 [file 14079821]

# Supplementary Material

**Coumarin-pi, a new antioxidant coumarin derivative from *Paxillus involutus***

Jin-Xiu Zhang<sup>a</sup>, Jian-Hua Lv<sup>b</sup>, Li-Qiang Zhao<sup>a</sup>, Xiao-Xi Shui<sup>a</sup>, Jun Zhang<sup>c</sup> and Li-An Wang<sup>a\*</sup>

<sup>a</sup>The Life Science College, Hebei Normal University, Shijiazhuang 050024, PRC;

<sup>b</sup>College of Agronomy, Jilin Agricultural University, Changchun, 130118, PRC;

<sup>c</sup>Department of Natural Medicines, School of Pharmaceutical Sciences, Peking University Health Science Center, Beijing 100191, PRC..

**\*Corresponding Author**

**Prof. Li-An Wang,**

Tel: +86-0311-80787571; E-mail: [wlian1965@126.com](mailto:wlian1965@126.com)

## ABSTRACT

Chemical investigation of *Paxillus involutus* lead to the isolation of a new coumarin derivative coumarin-pi (**1**), and three known compounds (**2-4**). The structure of the new compound was elucidated by interpretation of 1D and 2D NMR data. Compound **1** possesses a rare benzofuranylcoumarin skeleton. The isolated compounds were evaluated for antioxidant activities and coumarin-pi (**1**) exhibited significant activity with IC<sub>50</sub> value of 16.3 µg/mL.

## Keywords

*Paxillus involutus*; benzofuranylcoumarin; antioxidant activity

## 1. Extraction and isolation

The fruiting bodies of *Paxillus involutus* were collected from Yanshan Mountain, Hebei Province, and identified by Prof. Li-an Wang.

The fresh fruiting bodies were dried in a constant temperature drying box at 42°C until a constant weight was reached, and then the material was powdered in a grinder. The powdered dried *Paxillus involutus* fruit (3 kg) was stirred in 30 L of ethyl acetate for 2 h and left to stand overnight at 4°C. The remaining precipitate was re-extracted 3-5 times following the protocol described above. The organic layer was concentrated under vacuum to yield the crude extract (94 g).

This residue was separated by silica gel CC by gradient elution with petroleum ether–ethyl acetate (1:0 to 0:1). The fraction eluted by petroleum ether–ethyl acetate at 5:1 was separated by silica gel CC to afford compound **2** and compound **3**. The fraction eluted by ethyl acetate was concentrated under vacuum and further separated by silica gel CC with CHCl<sub>3</sub>–MeOH (1:0 to 0:1). The fraction eluted by CHCl<sub>3</sub>–MeOH at 10:1 was separated by Sephadex LH-20 (MeOH) to afford compound **1**. The fraction eluted by CHCl<sub>3</sub>–MeOH at 5:1 was separated by silica gel CC to afford compound **4**.

## 2. DPPH radical scavenging activity

All reactions were conducted in 96-well microplates. The coumarin-pi was re-dissolved in methanol. Coumarin-pi at defined concentrations was mixed with 100 µL ( $2 \times 10^{-4}$  mol/L) of DPPH solution. BHA was used as the positive control. Additionally, 100 µL of coumarin-pi at defined concentrations was mixed with 100 µL

of ethanol, and these samples were used as *blanks*. Finally, 100  $\mu\text{L}$  of methanol and 100  $\mu\text{L}$  ( $2 \times 10^{-4}$  mol/L) of the DPPH solution were mixed, and this sample was used as the *control*. After 30 min of incubation at ambient temperature in darkness, the absorbance was determined at 517 nm with a spectrophotometer. Each experiment was repeated 6 times.

The scavenging activity was calculated according to the formula below:

$$\text{DPPH Scavenging (\%)} = [1 - (A_{\text{sample}} - A_{\text{blank}}) / A_{\text{control}}] \times 100$$

where  $A_{\text{sample}}$  was the absorbance of coumarin-pi or BHA mixed with DPPH at a particular concentration, and  $A_{\text{blank}}$  and  $A_{\text{control}}$  were the samples mentioned above.

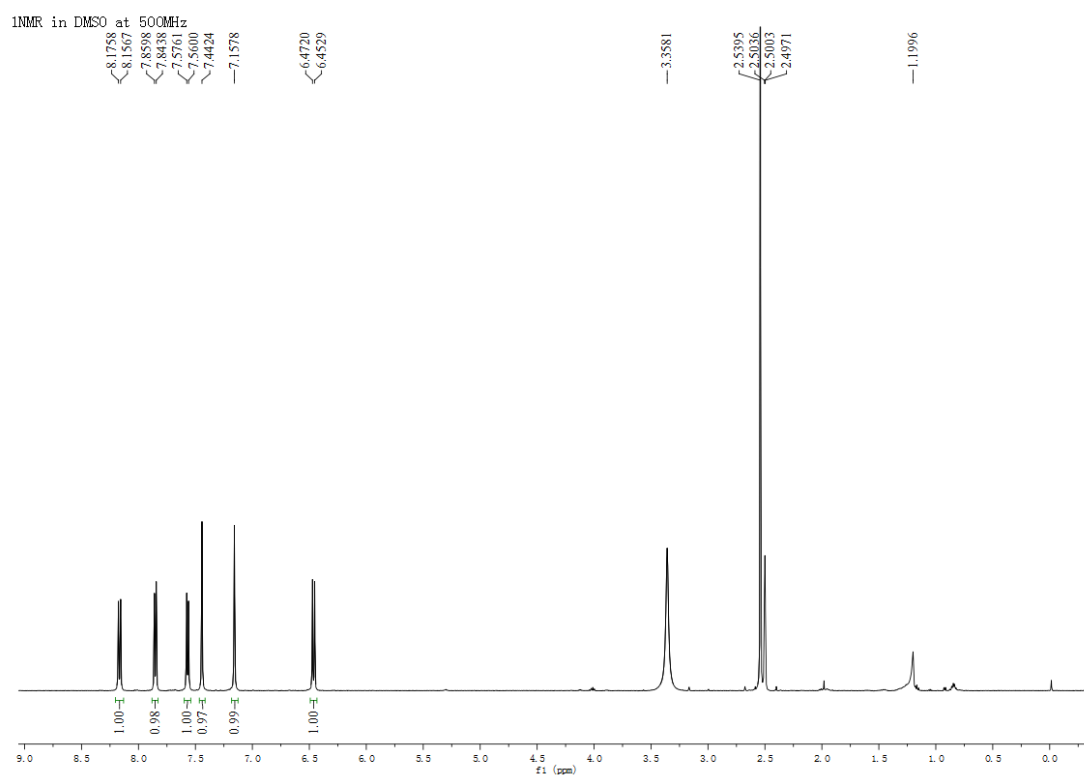

Figure S1. <sup>1</sup>H-NMR spectrum of compound **1**

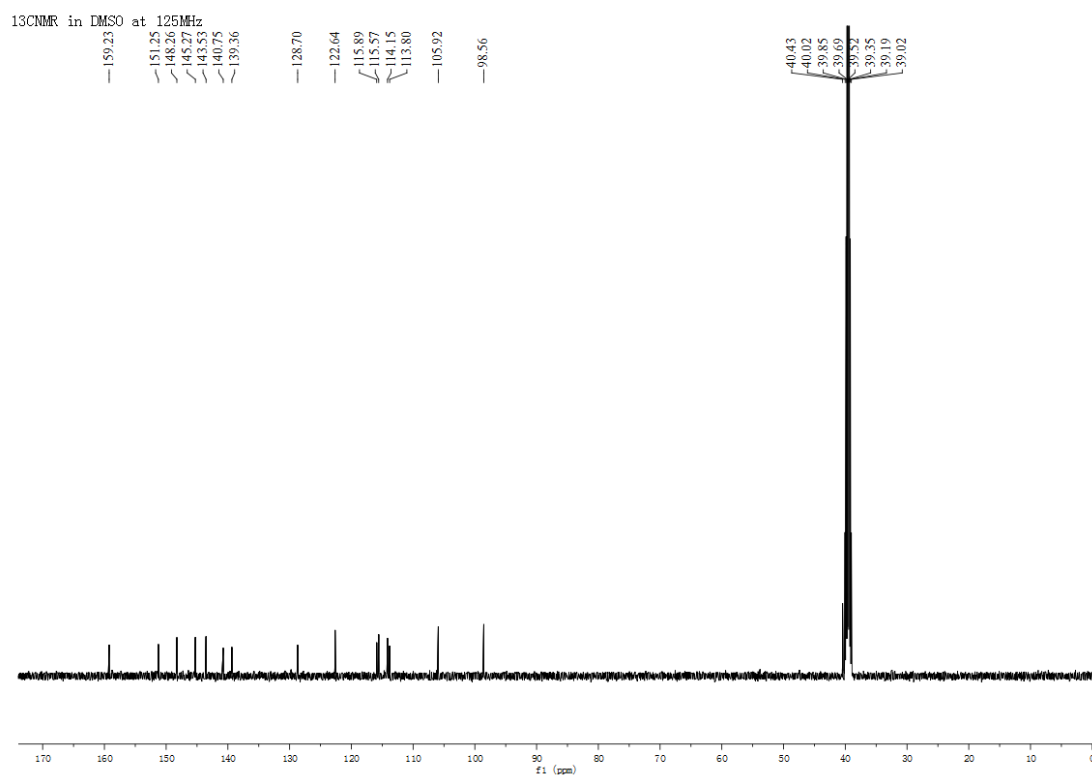

Figure S2. <sup>13</sup>C-NMR spectrum of compound **1**

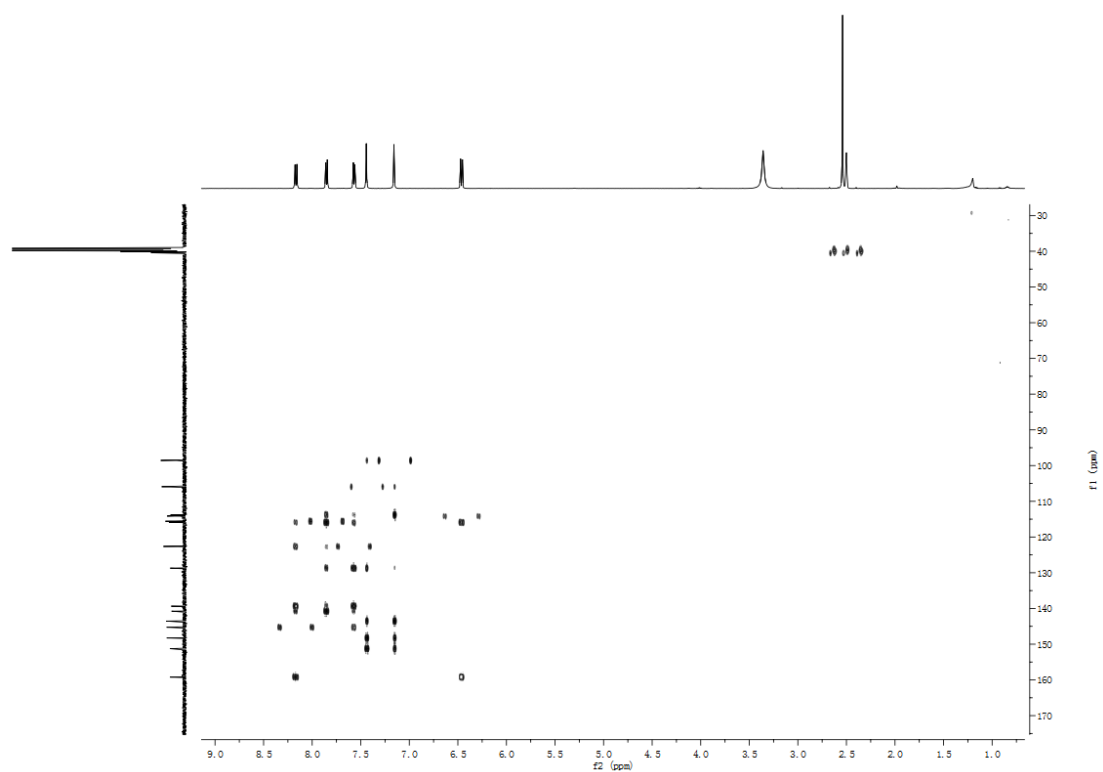

Figure S3.HMBC spectrum of compound **1**

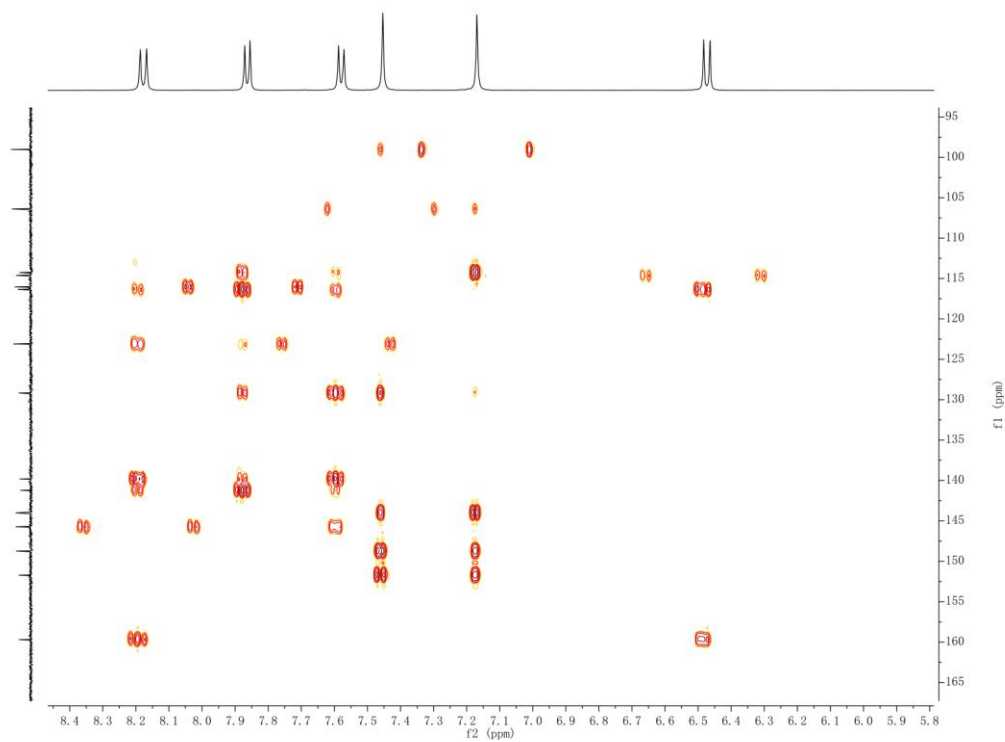

Figure S4.HMBC spectrum of compound **1**

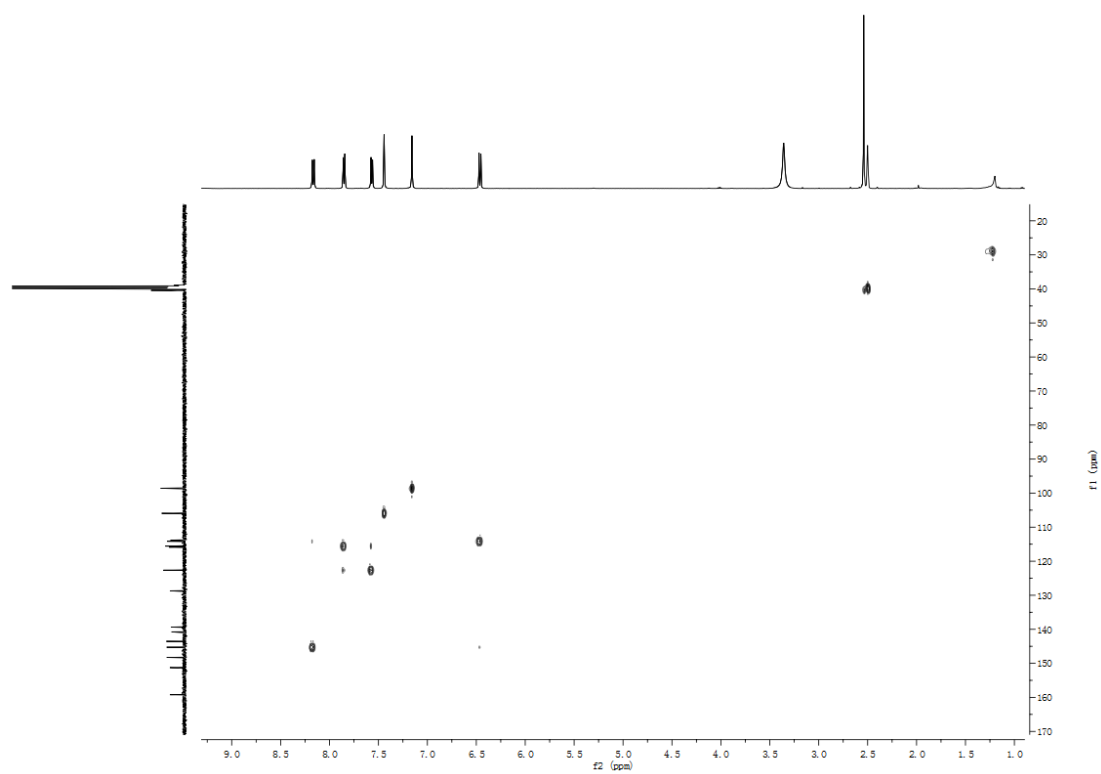

Figure S5. HSQC spectrum of compound **1**

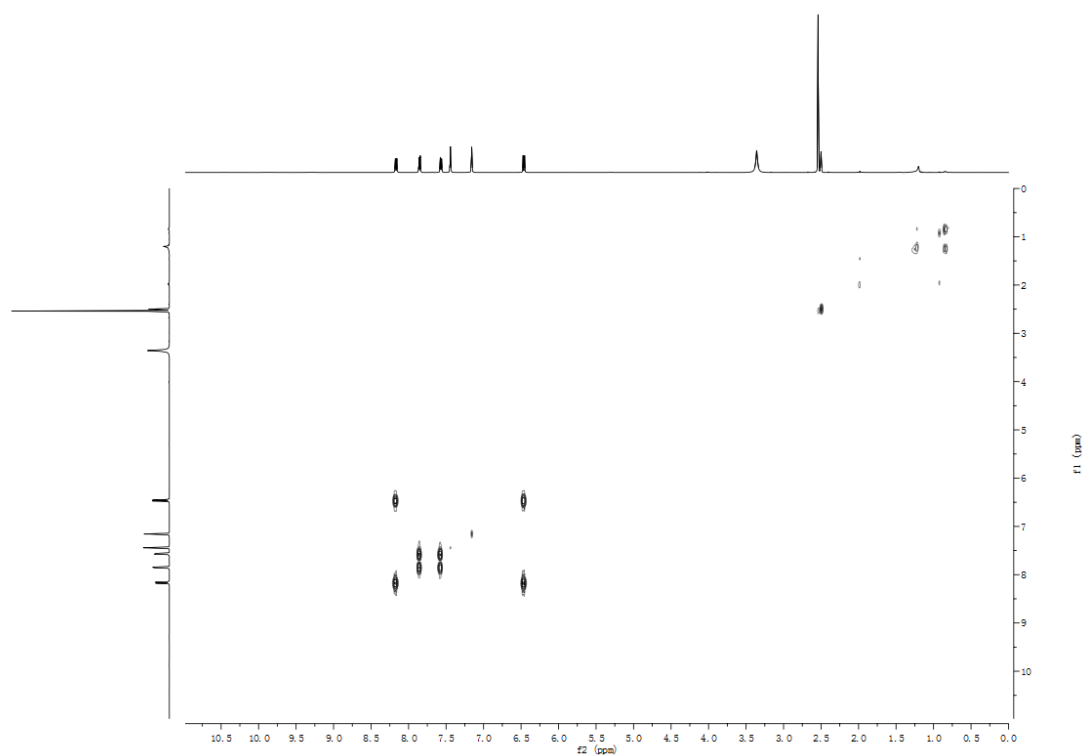

Figure S6.  $^1\text{H}$ - $^1\text{H}$  COSY spectrum of compound **1**

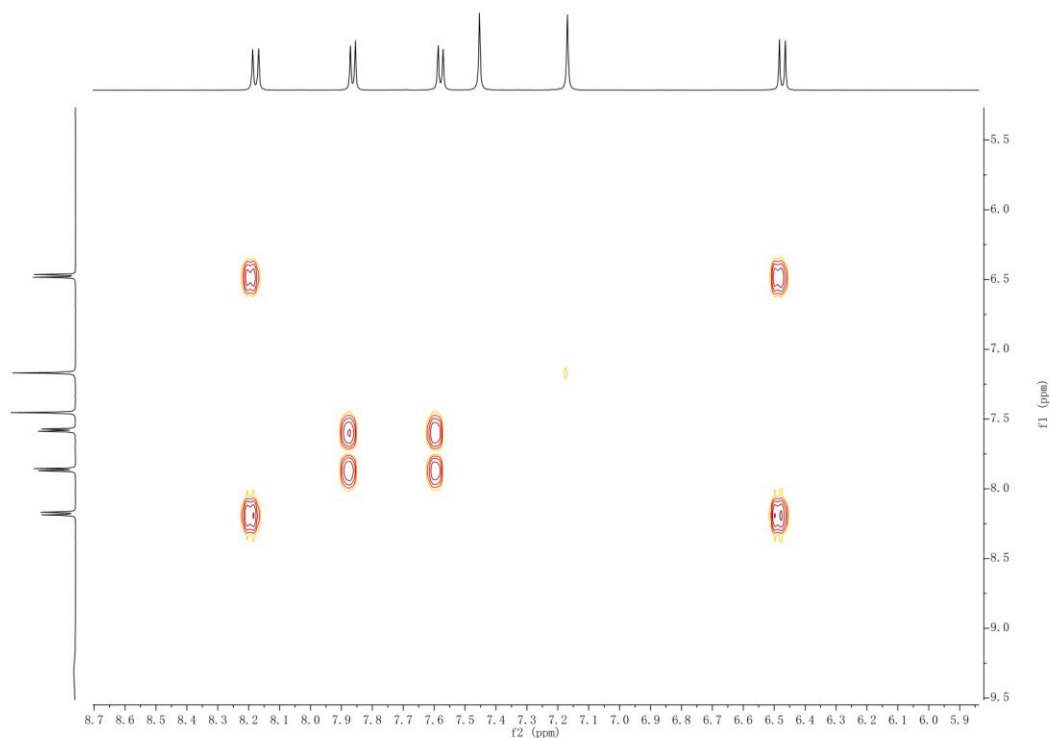

Figure S7.  $^1\text{H}$ - $^1\text{H}$  COSY spectrum of compound **1**

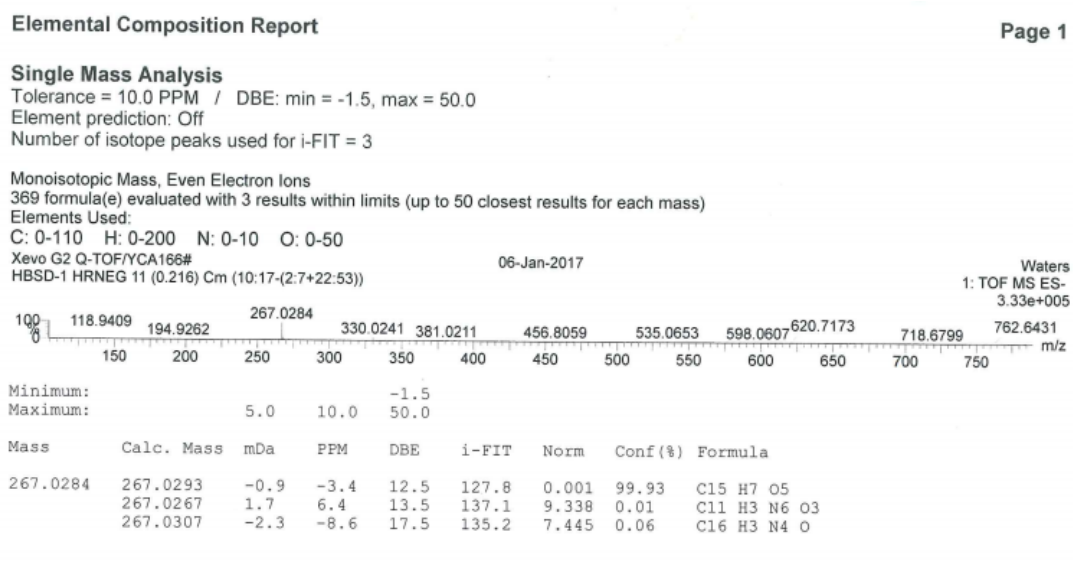

Figure S8. HRESI-MS spectrum of compound **1**



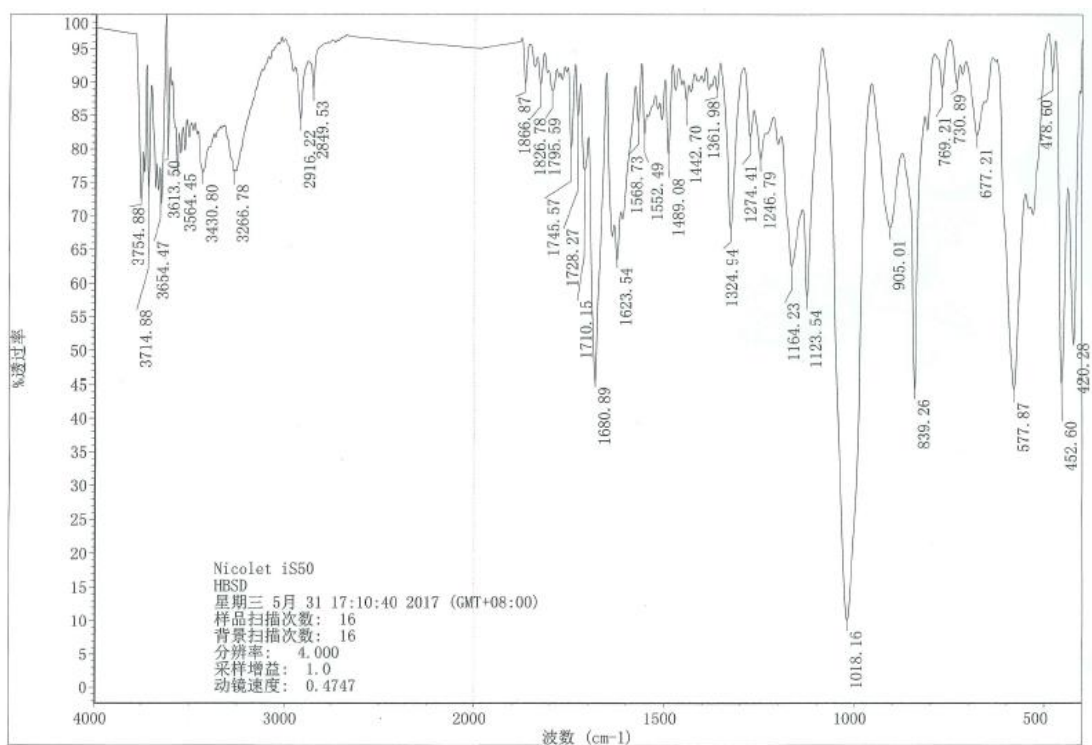

Figure S9. IR spectrum of compound **1**

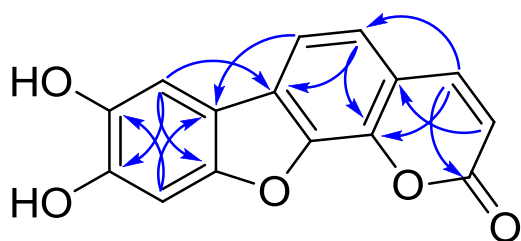

Figure S10. Key HMBC correlations of compound **1**.

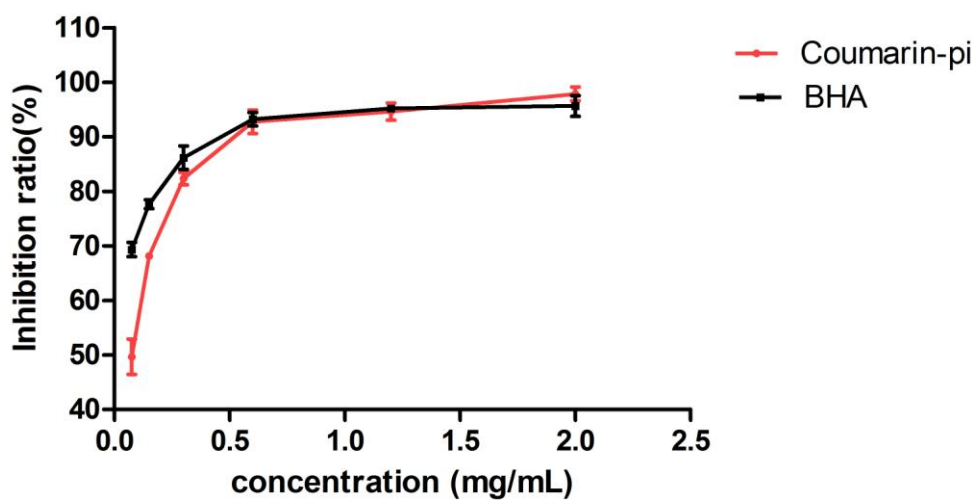

Figure S11. The antioxidant activity of compound **1**.

Table S1.  $^1\text{H}$  (500 MHz) and  $^{13}\text{C}$  (150 MHz) NMR data of compound **1** in  $\text{DMSO-}d_6$ .

| position | $\delta_{\text{C}}$ , type | $\delta_{\text{H}}$ ( $J$ in Hz) |
|----------|----------------------------|----------------------------------|
| 2        | 159.2, C                   |                                  |
| 3        | 114.1, CH                  | 6.46 (1H, d, $J = 9.5$ Hz)       |
| 4        | 145.3, CH                  | 8.17 (1H, d, $J = 9.5$ Hz)       |
| 4a       | 115.9, C                   |                                  |
| 5        | 122.6, CH                  | 7.57 (1H, d, $J = 8.0$ Hz)       |
| 6        | 115.6, CH                  | 7.85 (1H, d, $J = 8.0$ Hz)       |
| 7        | 128.7, C                   |                                  |
| 8        | 140.8, C                   |                                  |
| 8a       | 139.4, C                   |                                  |
| 9        | 113.8, C                   |                                  |
| 10       | 151.3 <sup>a</sup> , C     |                                  |
| 11       | 98.6, CH                   | 7.16 (1H, s)                     |
| 12       | 148.3 <sup>b</sup> , C     |                                  |
| 13       | 143.5 <sup>c</sup> , C     |                                  |
| 14       | 105.9, CH                  | 7.44 (1H, s)                     |

<sup>a</sup>, <sup>b</sup>, <sup>c</sup> maybe interchanged.
